# Supplementary material for: Preparation and characterization of glycosylated protein nanoparticles for astaxanthin mitochondria targeting delivery
Source: Royal Society of Chemistry journal article supplement (doi:10.1039/d1fo01751a), 2021-01-01
Supplement: d1fo01751a1.pdf [file d1fo01751a1.pdf]

## Supporting information

### **Preparation and characterization of glycosylated protein nanoparticles for astaxanthin mitochondria targeting delivery**

Yannan Chen<sup>abc</sup>, Shanshan Tie<sup>abc</sup>, Xuedi Zhang<sup>abc</sup>, Lijuan Zhang<sup>abc</sup>, and Mingqian  
Tan<sup>abc\*</sup>

*<sup>a</sup>Academy of Food Interdisciplinary Science, School of Food Science and Technology,  
Dalian Polytechnic University, Qinggongyuan1, Gangjingzi District, Dalian 116034,  
Liaoning, P. R. China*

*<sup>b</sup>National Engineering Research Center of Seafood, Dalian Polytechnic University,  
Dalian 116034, Liaoning, P. R. China*

*<sup>c</sup>Collaborative Innovation Center of Seafood Deep Processing, Dalian Polytechnic  
University, Dalian 116034, Liaoning, P. R. China*

*\*Corresponding authors. Mingqian Tan, Tel: +86-411-86318657, E-mail:  
mqtan@dlpu.edu.cn ORCID: 0000-0002-7535-0035; Qinggongyuan 1, Ganjingzi  
District, Dalian 116034, China*

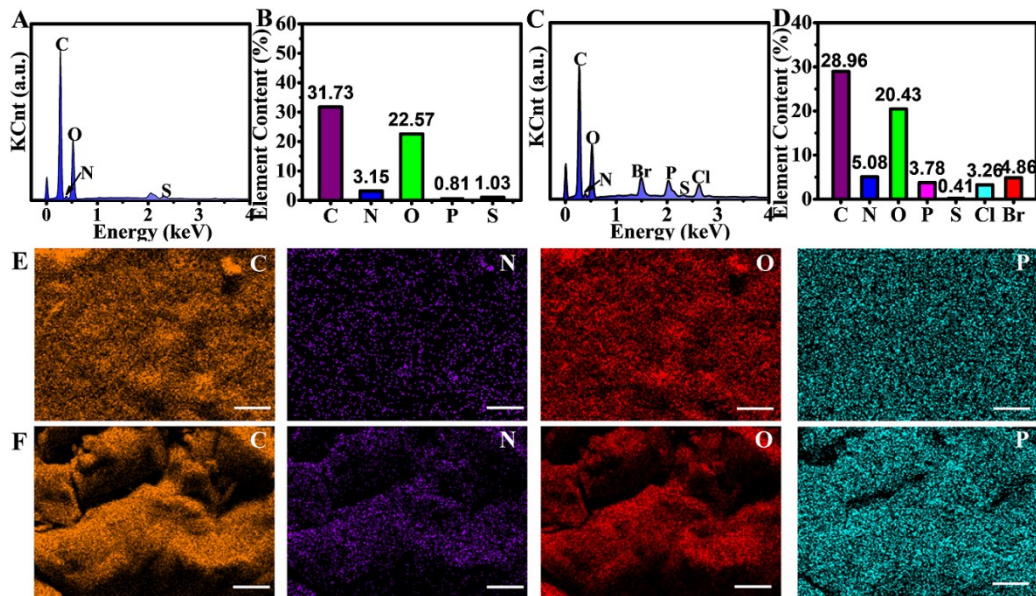

Fig. S1. EDS spectra, element content and elemental mapping images of WPI-DX (A,B,E) and TPP-WPI-DX (C,D,F).
